# Supplementary material for: Confined phase transition triggering a high-performance energy storage thermo-battery
Source: Royal Society of Chemistry journal article supplement (doi:10.1039/d4ee01435a), 2024-01-01
Supplement: d4ee01435a1.pdf [file d4ee01435a1.pdf]

## Supplementary Information

### **Confined phase transition triggering high-performance energy storage thermo-battery**

Jing Li, Shiyan Chen\*, Xiangyang Qu, Zhiliang Han, Zhou Zhou, Lili Deng, Yuhang Jia, Shengming Zhang, Ruimin Xie and Huaping Wang\*

State Key Laboratory for Modification of Chemical Fibers and Polymer Materials,  
College of Materials Science and Engineering, Donghua University, Shanghai 201620,  
PR China

E-mail: chensy@dhu.edu.cn, wanghp@dhu.edu.cn

### Note S1. Theoretical analysis of the thermopower

There is a hypothetical temperature-dependent reversible redox reaction between A and B ( $aA + ne^- \leftrightarrow bB$ ) in a thermos-electrochemical cell (TEC). The Seebeck coefficient ( $Se$ ) was calculated as the ratio of the potential difference ( $\Delta E$ ) to temperature difference ( $\Delta T$ ), according to Eq. 1:<sup>1, 2</sup>

$$Se = \frac{\Delta E}{\Delta T} = \frac{E_H - E_C}{T_H - T_C} \quad (1)$$

where  $E_H$  and  $E_C$  are the potential at the hot and cold sides of the sample, respectively. And  $T_H$  and  $T_C$  are the temperature at the hot and cold electrodes of TEC, respectively.

According to the Nernst equation, for above mentioned redox reaction ( $aA + ne^- \leftrightarrow bB$ ), the equilibrium potential ( $E$ ) can be expressed as:

$$E = E^0 + \frac{RT}{nF} \ln \frac{(a_A)^a}{(a_B)^b} \quad (2)$$

where  $E^0$  is the standard potential, F is the Faraday constant, R is the ideal gas constant,  $a_A$  and  $a_B$  are the activities of species A and B, respectively. The activity (a) is defined as the product of the activity coefficient ( $\gamma$ ) and concentration (C) ( $a = \gamma \times C$ ).

$$E = E^0 + \frac{RT}{nF} \left[ \ln \frac{(\gamma_A)^a}{(\gamma_B)^b} + \ln \frac{(C_A)^a}{(C_B)^b} \right] \quad (3)$$

According to Eq. 1,  $Se$  can be finally written as the sum of two terms:

$$Se = \frac{R}{nF\Delta T} \left[ T_H \ln \frac{(\gamma_A)_H^a}{(\gamma_B)_H^b} - T_C \ln \frac{(\gamma_A)_C^a}{(\gamma_B)_C^b} \right] + \frac{R}{nF\Delta T} \left[ T_H \ln \frac{(C_A)_T^a}{(C_B)_T^b} - T_C \ln \frac{(C_A)_C^a}{(C_B)_C^b} \right] \quad (4)$$

Excess free enthalpy ( $G^E$ ) refers to the difference between the real solution properties and the ideal solution free enthalpy properties under the same conditions of temperature, pressure and composition ( $G^E = \Delta G - \Delta G^{id}$ ). The  $G^E$  value is proportional to its  $\gamma$ .

$$G^E = RT \sum C_i \ln \gamma_i \quad (5)$$

where  $\Delta G$  is the Gibbs free energy,  $\Delta G^{id}$  is Gibbs free energy of ideal solution.

In general,  $\Delta G$  is calculated by:

$$\Delta G = \Delta H - T\Delta S \quad (6)$$

Phase transition is characterized as a discontinuous and abrupt change in volume, solubility, or molecular conformation of a material at its transition temperature.<sup>3</sup> The formation or dissolution of the precipitates is induced in a much narrower temperature region during a phase transition. Assuming that  $\Delta H$  is constant under the temperature

region which can be estimated from isothermal titration calorimetry.<sup>4, 5</sup>

$$\ln \gamma \propto -\Delta S \quad (7)$$

For the TEC containing the equal-concentration  $I^-/I_3^-$  aqueous electrolyte ( $I_3^- + 2e^- \leftrightarrow 3I^-$ ) with a certain amount of methylcellulose (MC) under the open-circuit state, when the hot electrode temperature is below the gelation temperature of MC, both concentrations of the redox species on the hot and cold sides are equal, that is,  $\Delta C = 0$ . In this case,  $Se$  is only related to the entropy difference of the redox reaction. Hence, the second term of Eq. 4 can be neglected, and  $Se$  can be simplified as:

$$Se = \frac{R}{2F\Delta T} \left[ T_H \ln \frac{(\gamma_{I_3^-})_H}{(\gamma_{I^-})_H^3} - T_C \ln \frac{(\gamma_{I_3^-})_C}{(\gamma_{I^-})_C^3} \right] \quad (8)$$

Here, it is worth noting that the definition of  $Se$  is defined as positive sign in this work.

When the hot electrode temperature is above the gelation temperature of MC, the hydrophobic interaction between MC and  $I_3^-$  ions leads to a substantially reduced  $I_3^-$  concentration at the hot side ( $\Delta C \neq 0$ ).<sup>6</sup> Thus, Eq. 4 is expressed as:

$$Se = -\frac{R}{2F\Delta T} \left[ T_H \ln \frac{(\gamma_{I_3^-})_H}{(\gamma_{I^-})_H^3} - T_C \ln \frac{(\gamma_{I_3^-})_C}{(\gamma_{I^-})_C^3} \right] - \frac{R}{2F\Delta T} \left[ T_H \ln \frac{(c_{I_3^-})_H}{(c_{I^-})_H^3} - T_C \ln \frac{(c_{I_3^-})_C}{(c_{I^-})_C^3} \right] \quad (9)$$

According to Eq. 9, the first term is considered to be dominated by difference in entropy ( $\Delta S$ ) between the redox anions,<sup>7, 8</sup> the second term is only related to the concentrations of A and B ( $\Delta C$ ).

$$\frac{1}{\Delta T} \left[ T_H \ln \frac{(\gamma_{I_3^-})_H}{(\gamma_{I^-})_H^3} - T_C \ln \frac{(\gamma_{I_3^-})_C}{(\gamma_{I^-})_C^3} \right] \propto \Delta S \quad (10)$$

$$\frac{1}{\Delta T} \left[ T_H \ln \frac{(c_{I_3^-})_H}{(c_{I^-})_H^3} - T_C \ln \frac{(c_{I_3^-})_C}{(c_{I^-})_C^3} \right] \propto \Delta C \quad (11)$$

On the contrary,  $Se$  here has opposite sign compared to the one mentioned above Eq. 8.

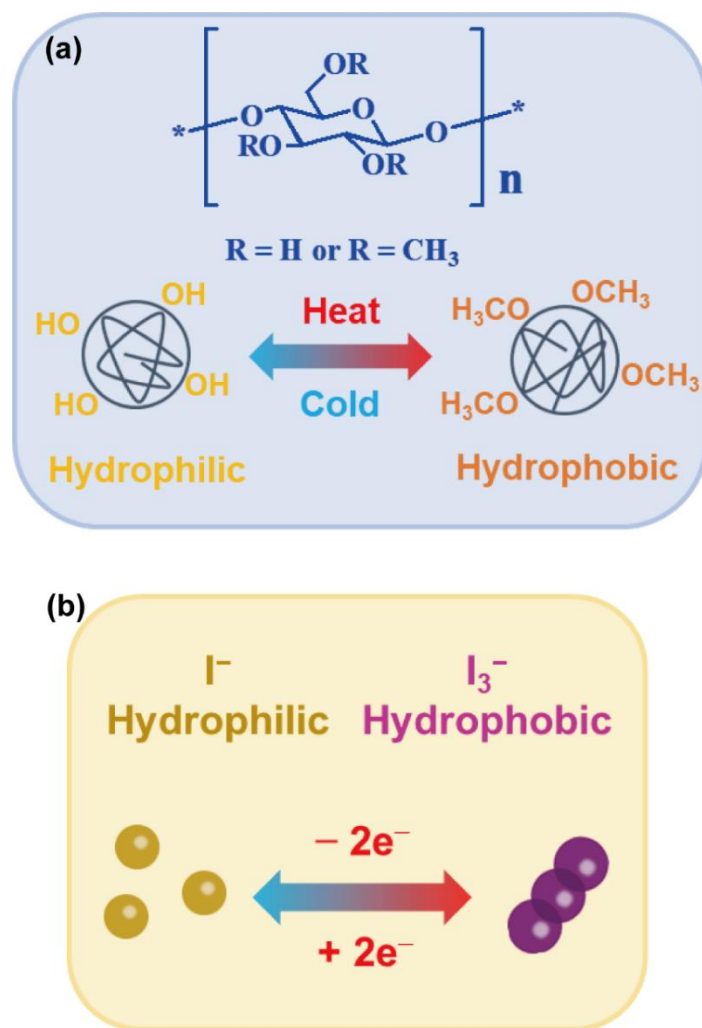

**Fig. S1** The molecular structure and properties of (a) MC and (b)  $I^-$  and  $I_3^-$  ions.

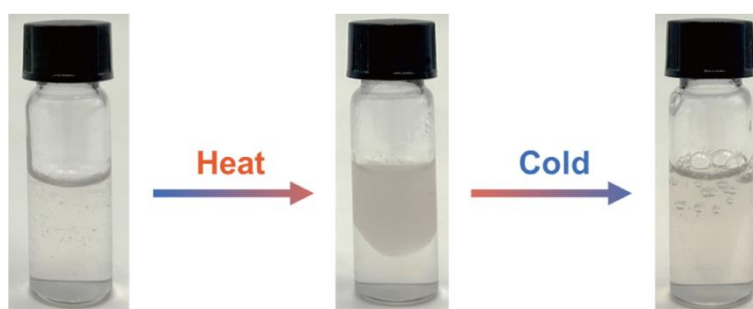

**Fig. S2** Photograph of 2 wt% MC electrolyte upon heating and cooling.

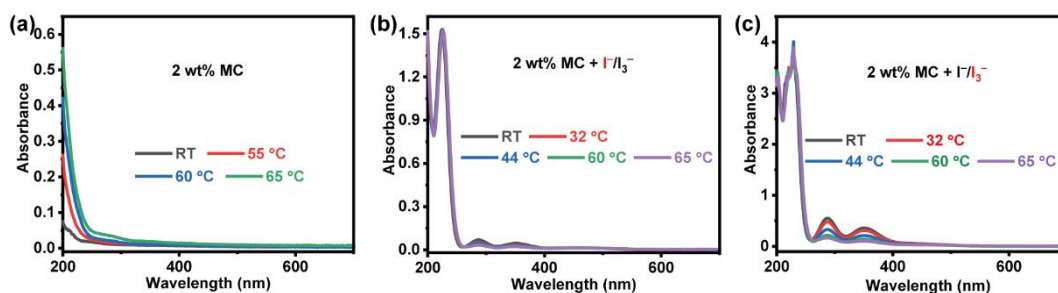

**Fig. S3** UV-Vis spectra of 2 wt% MC diluted 25 times (a), 2 wt% MC +  $I^-/I_3^-$  diluted to  $2 \times 10^{-5}$  M (b), and 2 wt% MC +  $I^-/I_3^-$  diluted to  $10^{-4}$  M (c) in the electrolyte at different temperatures. The peak at 225 nm is assignable to the  $I^-$  ion, and the peaks at 288 and 352 nm are assigned to  $I_3^-$  species dissolved in deionized water. This dilution concentration refers to the  $I^-/I_3^-$  solution.

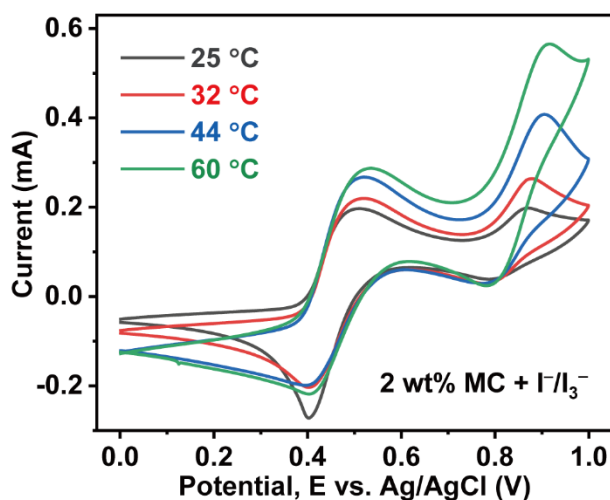

**Fig. S4** CV curves of 2 wt% MC +  $I^-/I_3^-$  electrolyte with increasing temperature.

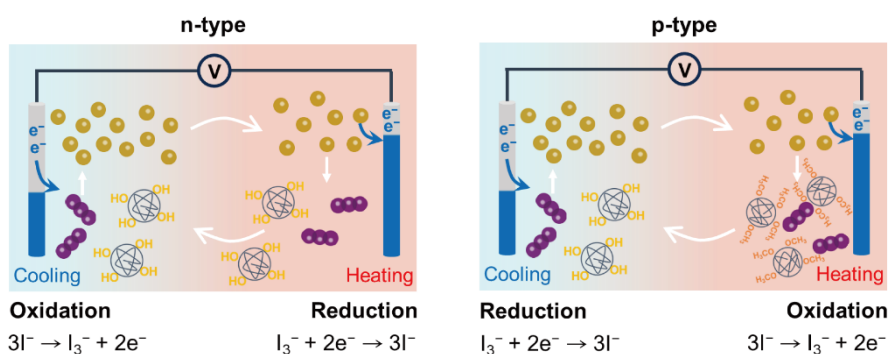

**Fig. S5** Schematics of n-type TEC and p-type thermo-battery for  $I^-/I_3^-$  redox couple induced by MC.

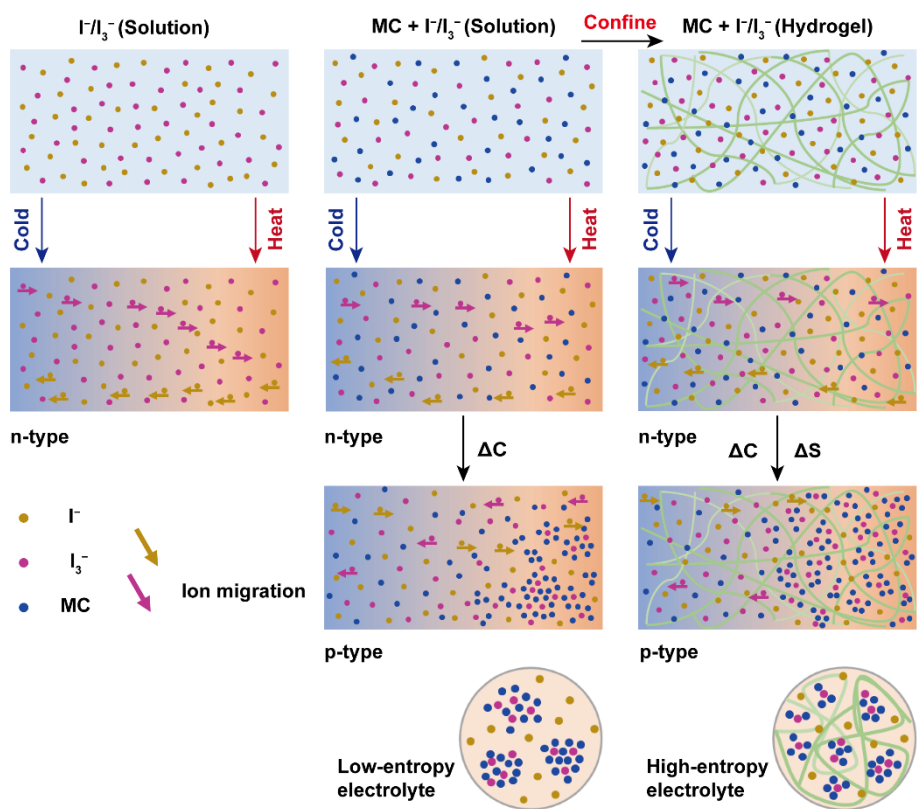

**Fig. S6** Design concept of thermo-batteries and schematic of enhanced thermopower. Low-entropy electrolyte refer to the electrolyte system with a weak solvation interaction between the  $I_3^-$  ions and  $H_2O$ . In contrast, high-entropy electrolyte refers to the electrolyte system with a strong solvation interaction between  $I_3^-$  ions and  $H_2O$ , which has smaller ion clusters.

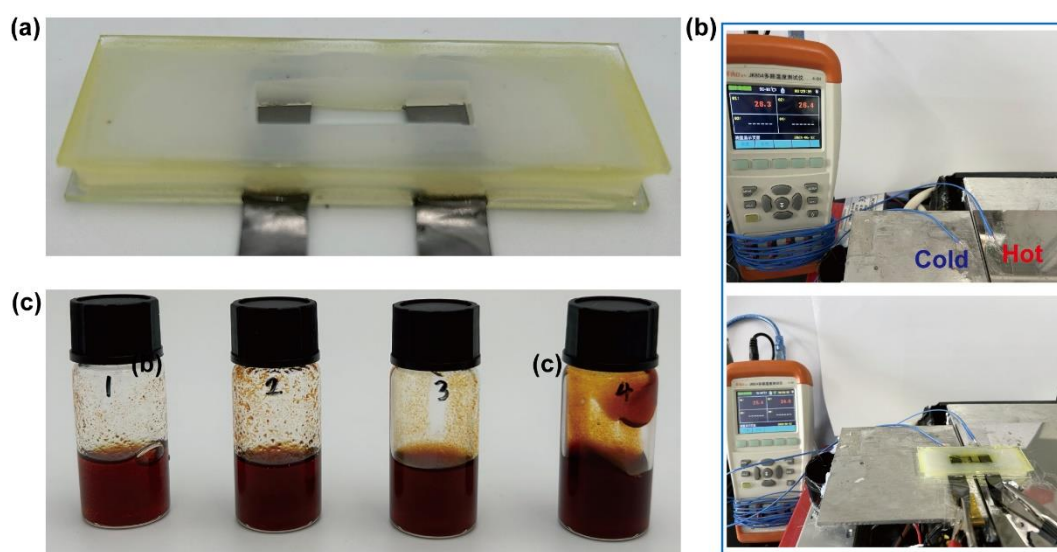

**Fig. S7** (a) Experimental setup for characterizing the thermopower and power

generation performance. (b) The photos of the home-made equipment. (c) Photograph of x wt% MC +  $I^-/I_3^-$  electrolytes (x = 1, 2, 3, 4) from left to right. The electrolytes become more viscous with the increase of MC content.

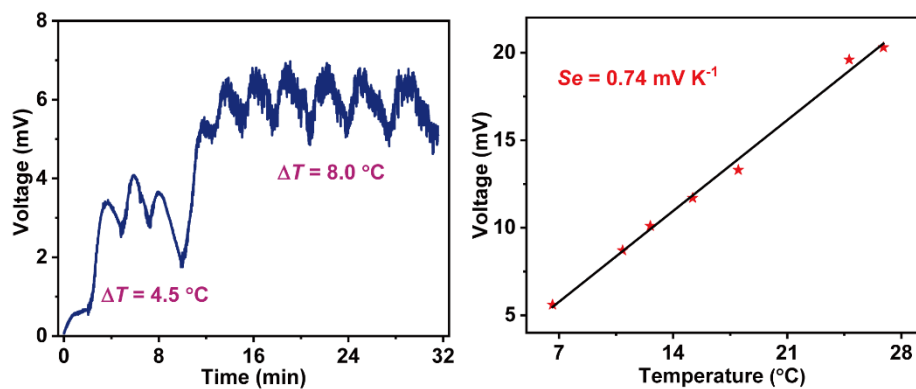

**Fig. S8** Recorded open-circuit voltage over time and  $Se$  of the thermocell with  $I^-/I_3^-$  electrolyte.

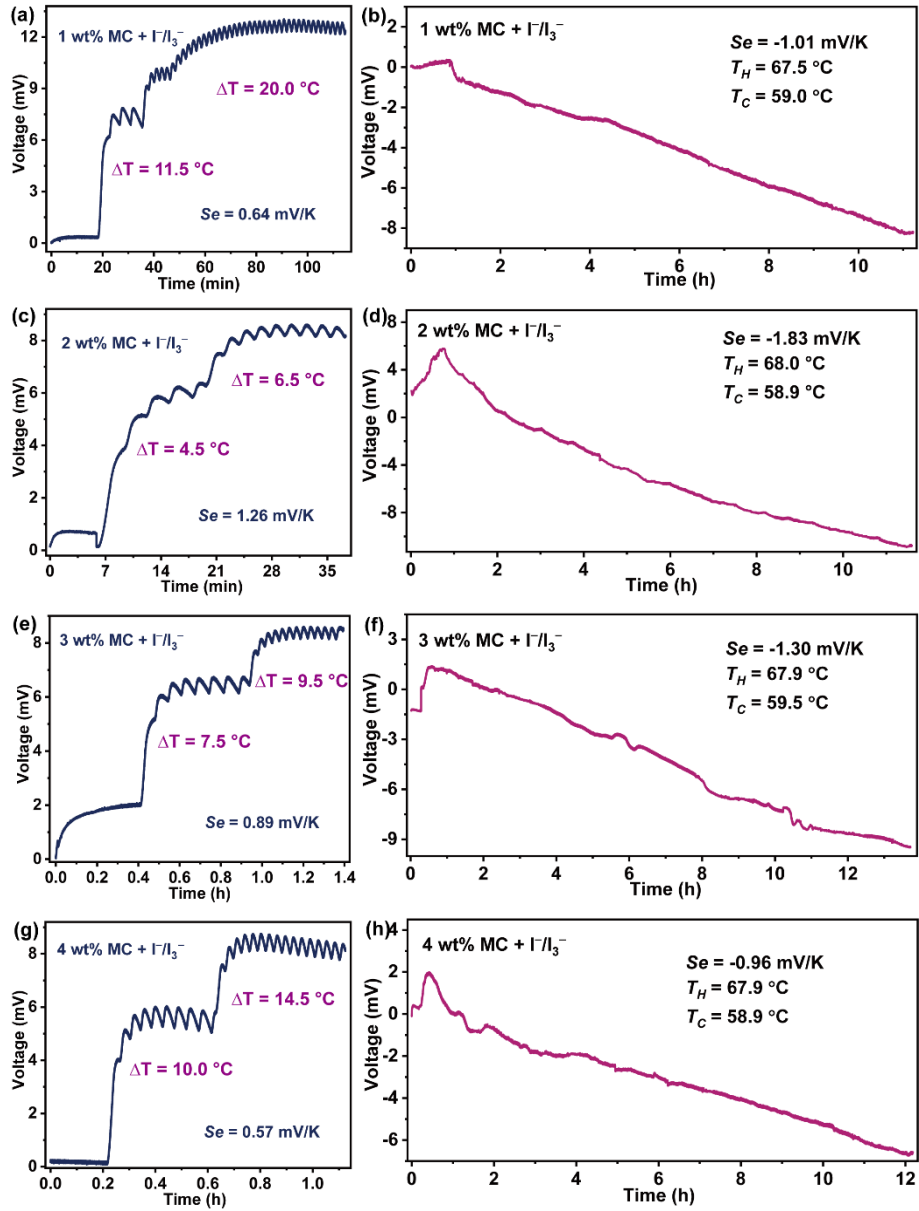

**Fig. S9** Recorded open-circuit voltages for (a) 1, (c) 2, (e) 3, and (g) 4 wt% MC +  $\Gamma/\text{I}_3^-$  electrolytes of n-type thermocells and for (b) 1, (d) 2, (f) 3, and (h) 4 wt% MC +  $\Gamma/\text{I}_3^-$  electrolytes of p-type thermo-batteries. And  $T_H$  is held at room temperature for n-type thermocell.



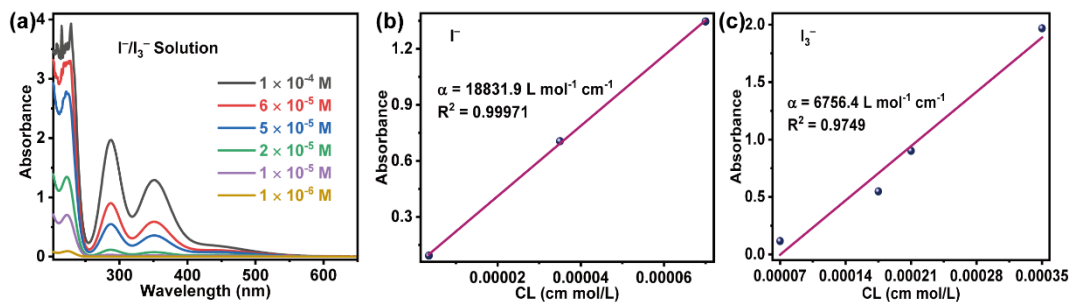

**Fig. S10** (a) UV-Vis spectra of  $\text{I}^-/\text{I}_3^-$  solutions with a series of concentration gradients. The fitting of molar extinction coefficient of (b)  $\text{I}^-$  at 225 nm, and (c)  $\text{I}_3^-$  at 288 nm based on the absorbance at different concentrations. The thickness of the solution is 3 cm in the cuvette.

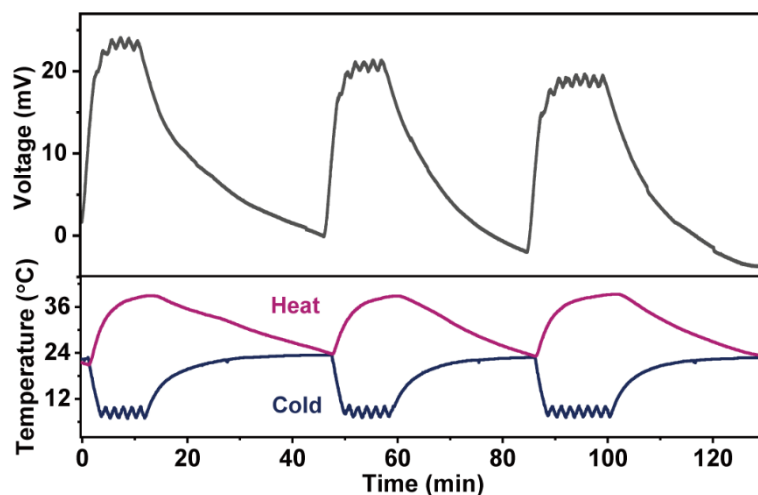

**Fig. S11** The open-circuit voltage-time curves of  $\text{I}^-/\text{I}_3^-$  electrolyte with and without temperature difference.

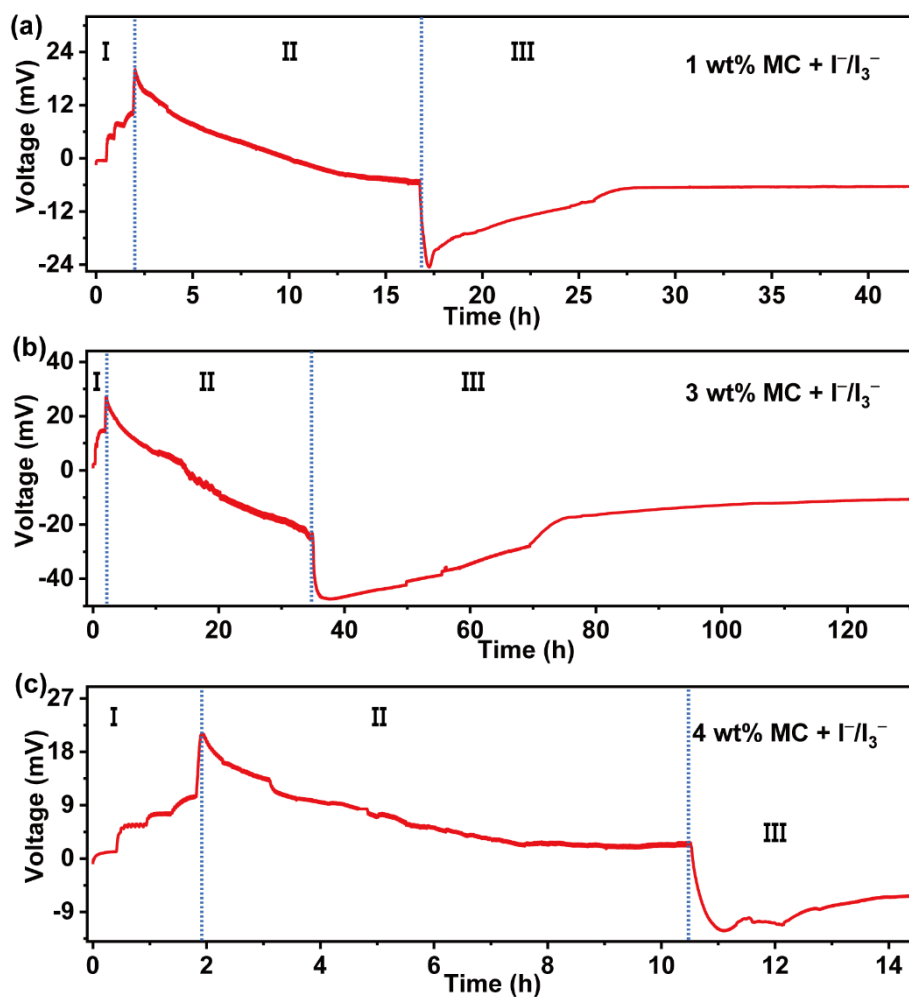

**Fig. S12** Recorded open-circuit voltages for (a) 1, (b) 3 and (c) 4 wt% MC + I<sup>-</sup>/I<sub>3</sub><sup>-</sup> electrolytes during charging and self-discharging (I:  $T_H < 56$  °C, n-type; II:  $T_H > 56$  °C, p-type; III:  $\Delta T = 0$  °C, the  $V_{OC}$  decreases slowly), The cold electrode temperature is held at 15 °C.

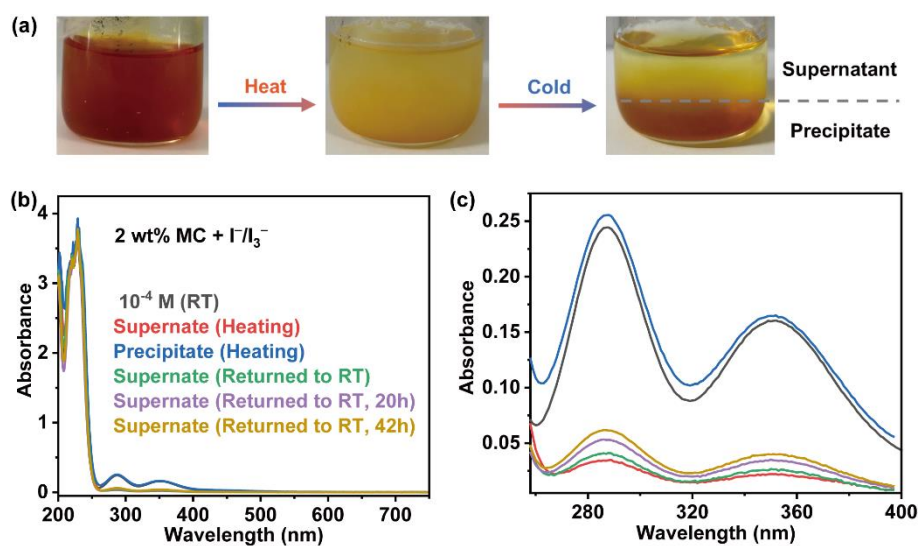

**Fig. S13** (a) Photographs of 2 wt% MC +  $I^-/I_3^-$  electrolyte under different temperatures, and the schematic showing the change of MC from the hydrophobic to hydrophilic state upon heating and cooling. (b) UV-Vis spectra of the 2 wt% MC +  $I^-/I_3^-$  electrolytes with different treatment conditions, and magnified UV-Vis spectra (c) of wavelengths from 258 to 400 nm.

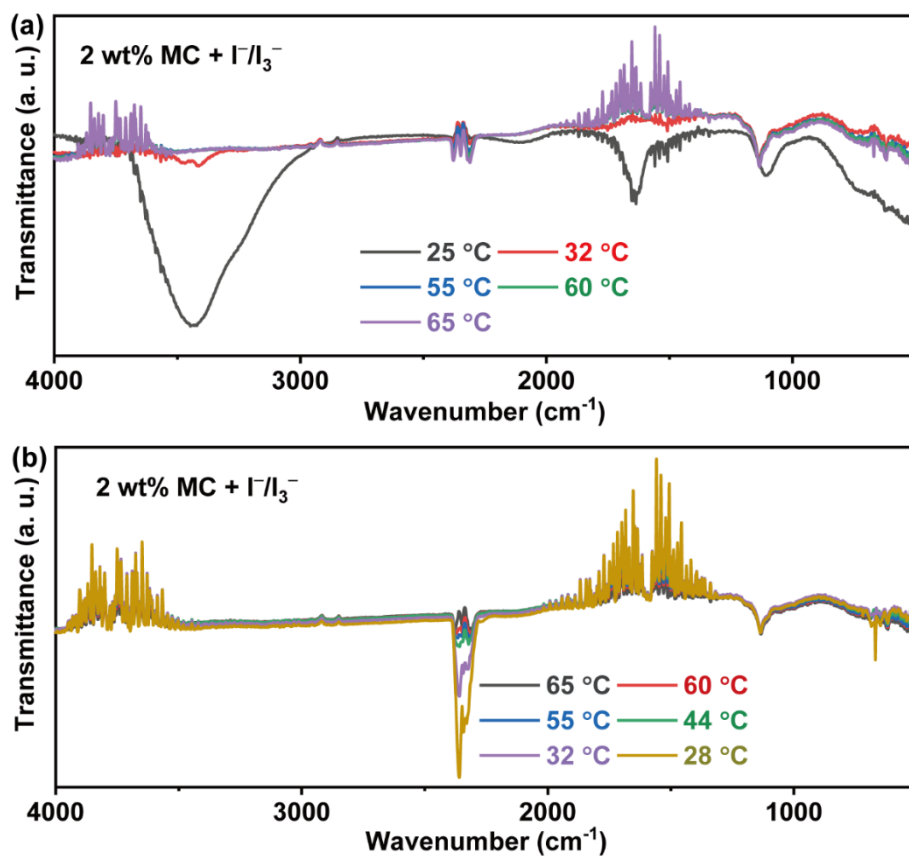

**Fig. S14** FTIR spectra about 2 wt% MC +  $I^-/I_3^-$  electrolyte solution in a closed heating (a) and cooling (b) cycle.

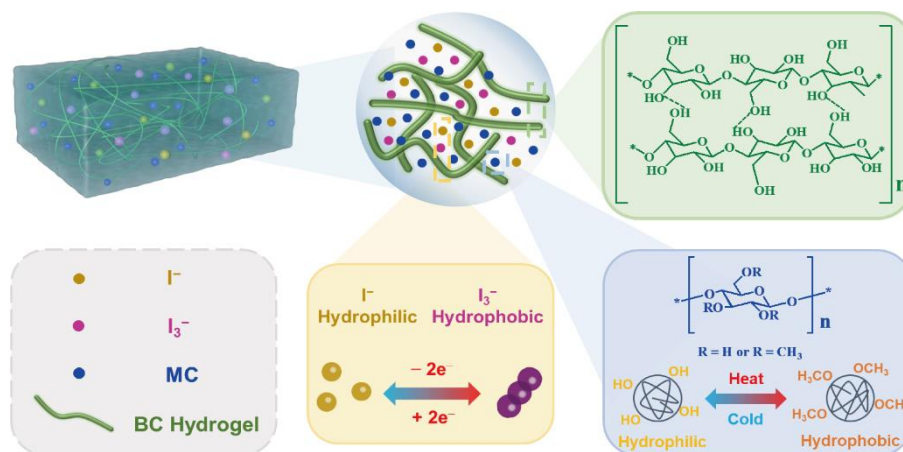

**Fig. S15** Components of BC hydrogel-based 2 wt% MC +  $I^-/I_3^-$  electrolyte.

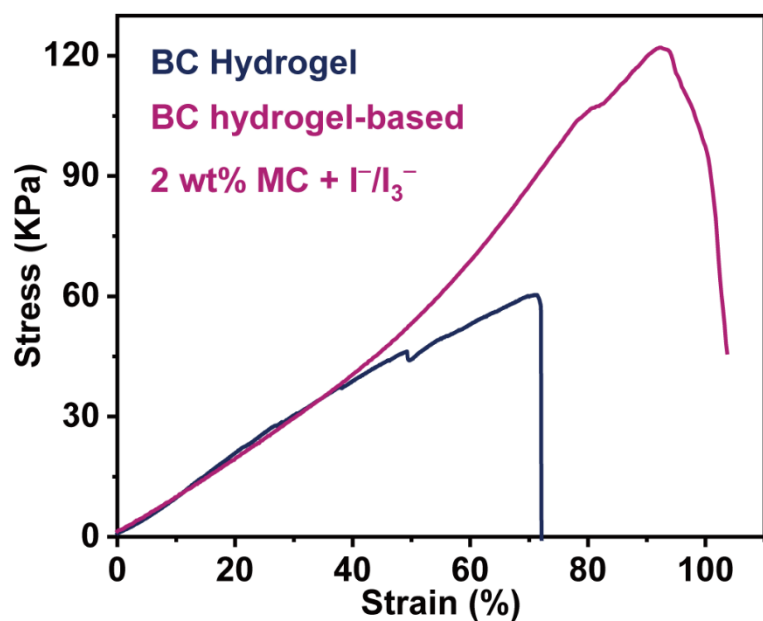

**Fig. S16** Tensile stress-strain curves of BC hydrogel and BC hydrogel-based 2 wt% MC + I<sup>-</sup>/I<sub>3</sub><sup>-</sup> electrolyte, respectively.

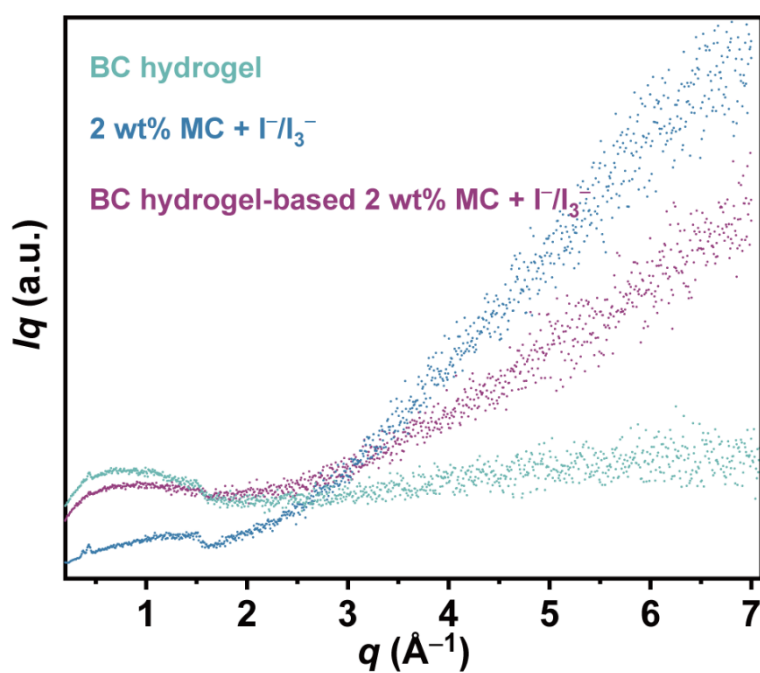

**Fig. S17** Representative SAXS profiles of BC hydrogel, 2 wt% MC + I<sup>-</sup>/I<sub>3</sub><sup>-</sup> and BC hydrogel-based 2 wt% MC + I<sup>-</sup>/I<sub>3</sub><sup>-</sup> electrolytes under 60 °C, respectively.

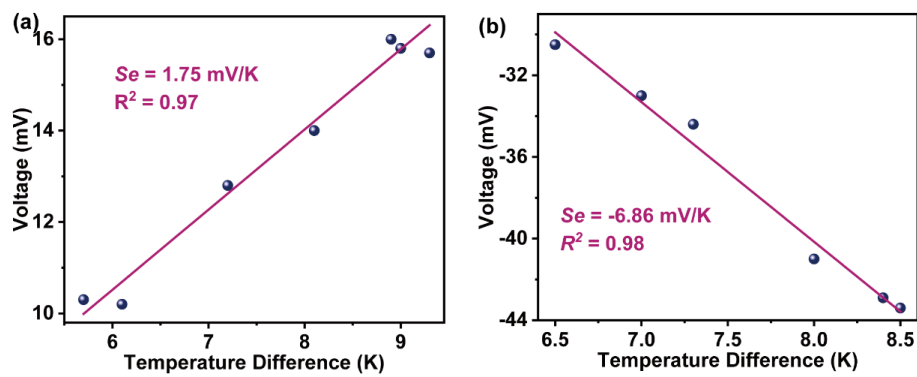

**Fig. S18**  $Se$  for n-type thermocell (a) and p-type thermo-battery (b) with BC hydrogel-based 2 wt% MC +  $\Gamma/I_3^-$  electrolyte, respectively.

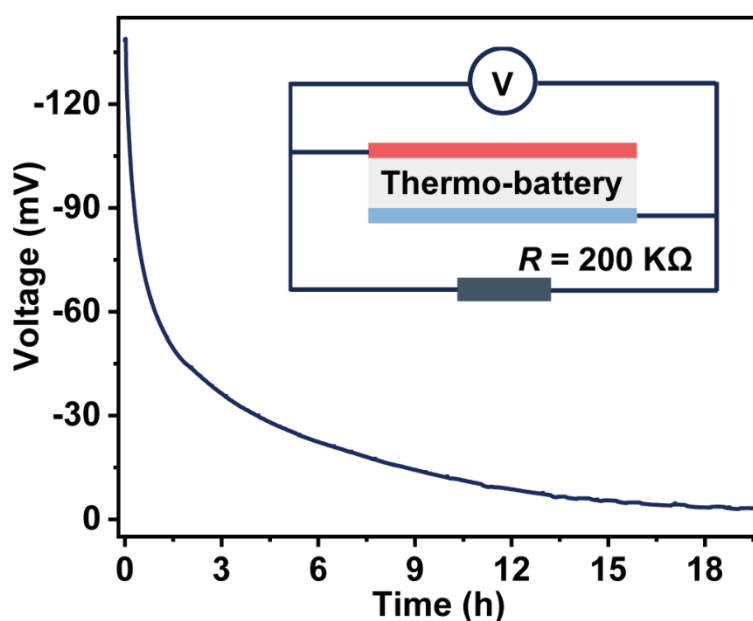

**Figure S19.** The open-circuit voltage of the continuous discharge process at the external resistor  $R = 200 \text{ k}\Omega$  and  $\Delta T = 0 \text{ }^\circ\text{C}$ . The inset shows the measurement circuit.

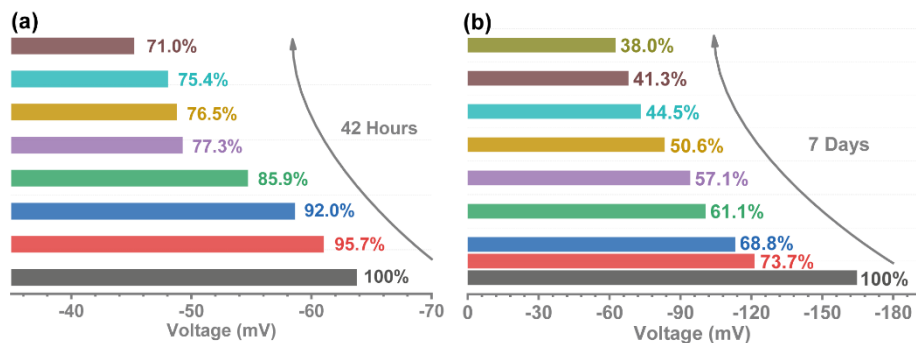

**Fig. S20** (a) The  $V_{OC}$  attenuation of 2 wt% MC + I<sup>-</sup>/I<sub>3</sub><sup>-</sup> electrolytes during self-discharging process. The self-discharge time is successively 0, 6, 12, 18, 24, 30, 36 and 42 hours from bottom to top. (b) The  $V_{OC}$  attenuation of BC hydrogel-based 2 wt% MC + I<sup>-</sup>/I<sub>3</sub><sup>-</sup> electrolytes during self-discharging process. The self-discharge time is successively 0, 0.5, 1, 2, 3, 4, 5, 6 and 7 days from bottom to top.

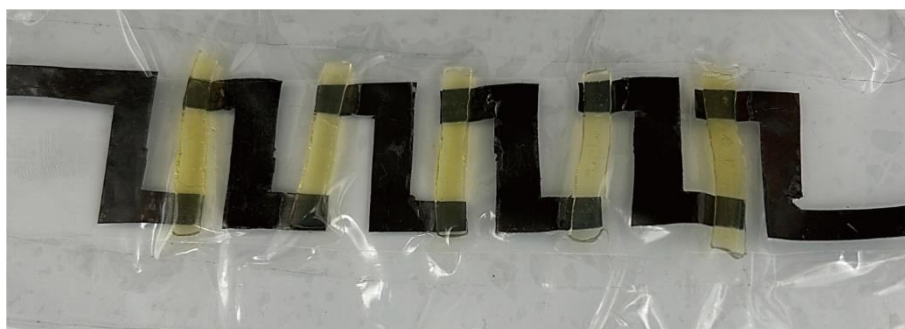

**Fig. S21** Photograph of a device module containing 5 units in series.

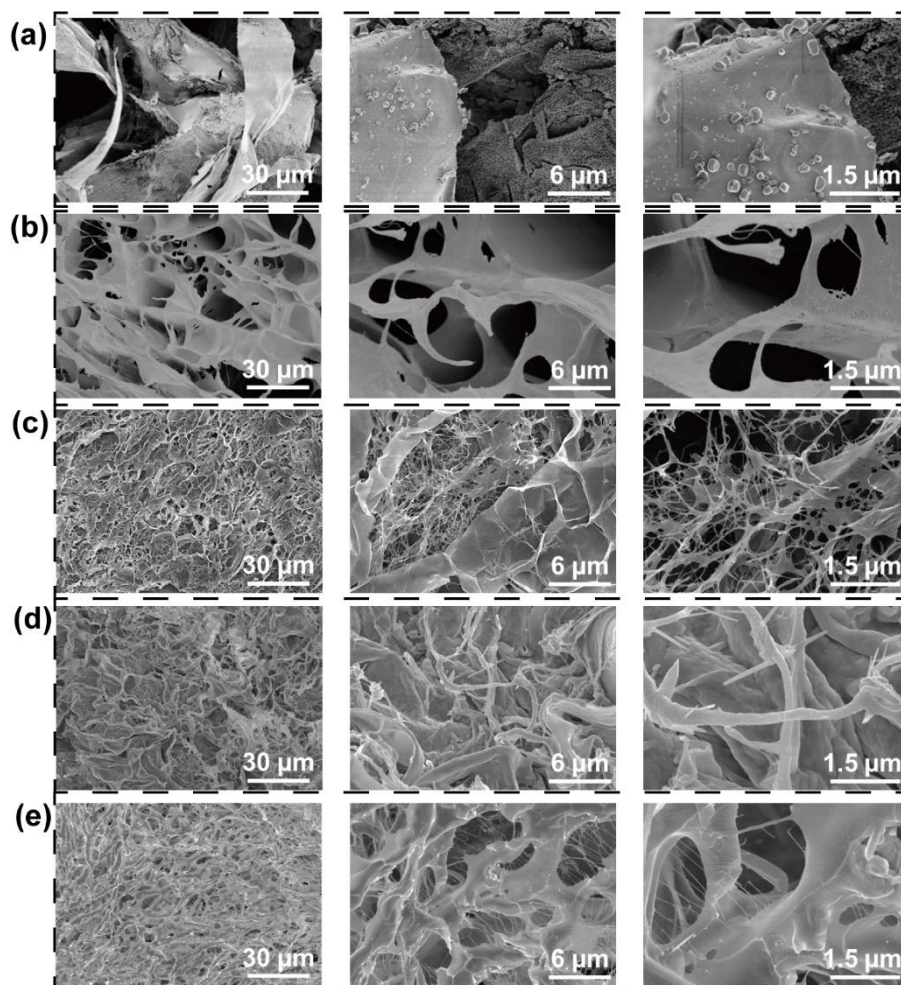

**Fig. S22** Morphology characterization of 2 wt% MC +  $\Gamma/I_3^-$  electrolyte with RT (b) and heat (c), BC hydrogel (d), and BC hydrogel-based 2 wt% MC +  $\Gamma/I_3^-$  electrolyte under RT (e) and heating (f) at different magnifications.

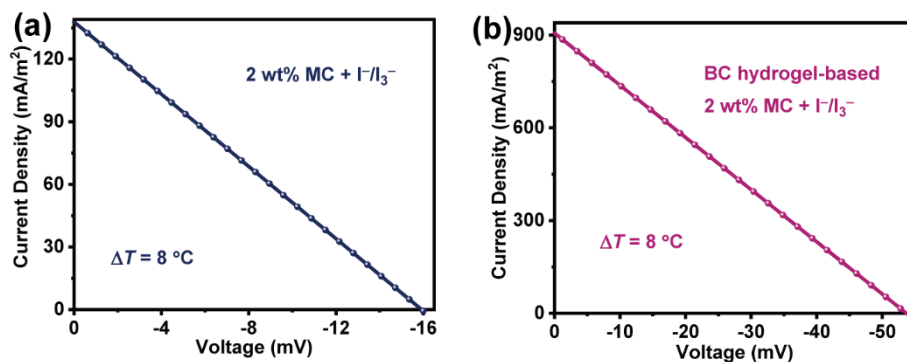

**Fig. S23** The output voltage-current density curve of p-type thermo-battery without (a) and with (b) BC hydrogel for 2 wt% MC +  $\Gamma/I_3^-$  electrolyte under  $\Delta T = 8^\circ C$ . The cold electrode temperature is fixed at  $58^\circ C$ .



**Table S1.** When the hot electrode temperature is below/above the gelation temperature of MC, the reactions at hot and cold electrodes.

|        |                |                                 |
|--------|----------------|---------------------------------|
| n-type | Hot electrode  | $I_3^- + 2e^- \rightarrow 3I^-$ |
|        | Cold electrode | $3I^- \rightarrow I_3^- + 2e^-$ |
| p-type | Hot electrode  | $3I^- \rightarrow I_3^- + 2e^-$ |
|        | Cold electrode | $I_3^- + 2e^- \rightarrow 3I^-$ |

**Table S2.** Comparison of  $Se$  values in this work with those reported for  $I^-/I_3^-$  based thermocells in the literature.

| Redox Couple | State  | Hydrophobic Matrix           | n/p-type | $Se$ (mV/K) | References       |
|--------------|--------|------------------------------|----------|-------------|------------------|
| $I^-/I_3^-$  | Liquid | --                           | n        | 0.71        | 6                |
|              | Liquid | $\alpha$ -cyclodextrins      | n        | 1.45        | 5                |
|              | Liquid | Starch                       | n        | 1.50        | 9                |
|              | Liquid | Poly (N-isopropylacrylamide) | n        | 0.71        | 10               |
|              |        |                              | p        | -1.91       |                  |
|              | Liquid | Poly (N-isopropylacrylamide) | n        | 0.71        | 11               |
|              |        |                              | p        | -1.19       |                  |
|              | Liquid | Methylcellulose              | n        | 1.32        | 6                |
|              |        |                              | p        | -1.48       |                  |
|              | Liquid | Methylcellulose              | n        | 1.26        | <b>This work</b> |
|              |        |                              | p        | -1.83       |                  |
|              | BC     | Methylcellulose              | n        | 1.75        |                  |
| Hydrogel     |        | p                            | -6.84    |             |                  |

## References

- 1 W. Zhao, Z. Wang, R. Hu and X. Luo, *EPL (Europhysics Letters)*, 2021, **135**, 26001.
- 2 Y. Liu, M. Cui, W. Ling, L. Cheng, H. Lei, W. Li and Y. Huang, *Energy Environ.*

- Sci.*, 2022, **15**, 3670–3687.
- 3 H. Zhou, H. Inoue, M. Ujita and T. Yamada, *Angew. Chem. Int. Ed.*, 2023, **62**, e202213449.
  - 4 H. Wang, S. C. Kim, T. Rojas, Y. Zhu, Y. Li, L. Ma, K. Xu, A. T. Ngo and Y. Cui, *J. Am. Chem. Soc.*, 2021, **143**, 2264–2271.
  - 5 H. Zhou, T. Yamada and N. Kimizuka, *J. Am. Chem. Soc.*, 2016, **138**, 10502–10507.
  - 6 Y. Han, J. Zhang, R. Hu and D. Xu, *Sci. Adv.*, 2022, **8**, eab15318.
  - 7 B. Yu, J. Duan, H. Cong, W. Xie, R. Liu, X. Zhuang, H. Wang, B. Qi, M. Xu, Z. L. Wang and J. Zhou, *Science*, 2020, **370**, 342–346.
  - 8 S. Sahami and M. J. Weaver, *J. Electroanal. Chem.*, 1981, **122**, 155–170.
  - 9 H. Zhou, T. Yamada and N. Kimizuka, *Sustain. Energ. Fuels*, 2018, **2**, 472–478.
  - 10 J. Duan, B. Yu, K. Liu, J. Li, P. Yang, W. Xie, G. Xue, R. Liu, H. Wang and J. Zhou, *Nano Energy*, 2019, **57**, 473–479.
  - 11 X. Shen, J. Wu, Z. Hua and G. Liu, *ACS Appl. Energy Mater.*, 2023, **6**, 10147–10154.
